# Supplementary material for: Genetic Testing Resources and Practice Patterns Among Pediatric Cardiomyopathy Programs
Source: Springer Nature journal article supplement (doi:10.1007/s00246-024-03498-6), 2024-05-07
Supplement: MOESM1 [file 27064786]

## **Online Resource 1**

**Article Title:** Genetic testing resources and practice patterns among pediatric cardiomyopathy programs

**Journal:** Pediatric Cardiology

**Authors:** Justin Godown, Emily Kim, Melanie D. Everitt, Wendy K. Chung, Irene Lytrivi, Sonya Kirmani, Paul Kantor, Stephanie Ware, Jean Ballweg, Ashwin K. Lal, Neha Bansal, Jeffrey Towbin, Steven E. Lipshultz\*, Teresa M. Lee.

**\* Corresponding author affiliation:**

Steven E. Lipshultz

Professor of Pediatrics

University at Buffalo Jacobs School of Medicine and Biomedical Sciences

Clinical and Translational Research Center

E-mail: [slipshul@buffalo.edu](mailto:slipshul@buffalo.edu)

**Caption:** Data dictionary of the RedCAP survey distributed to providers

**Data Dictionary Codebook**  
**Genetics Survey**

| #                                                    | Variable / Field Name                                              | Field Label<br><i>Field Note</i>                                    | Field Attributes (Field Type, Validation, Choices, Calculations, etc.)                                                                                                                                                                                                                                                                                                                                                                                                                               |   |                |                                                     |              |                |                                                       |   |                |                                                 |                |                |                                              |   |                |       |
|------------------------------------------------------|--------------------------------------------------------------------|---------------------------------------------------------------------|------------------------------------------------------------------------------------------------------------------------------------------------------------------------------------------------------------------------------------------------------------------------------------------------------------------------------------------------------------------------------------------------------------------------------------------------------------------------------------------------------|---|----------------|-----------------------------------------------------|--------------|----------------|-------------------------------------------------------|---|----------------|-------------------------------------------------|----------------|----------------|----------------------------------------------|---|----------------|-------|
| <b>Instrument: Genetics Survey</b> (genetics_survey) |                                                                    |                                                                     |                                                                                                                                                                                                                                                                                                                                                                                                                                                                                                      |   |                |                                                     |              |                |                                                       |   |                |                                                 |                |                |                                              |   |                |       |
| 1                                                    | [record_id]                                                        | Record ID                                                           | text                                                                                                                                                                                                                                                                                                                                                                                                                                                                                                 |   |                |                                                     |              |                |                                                       |   |                |                                                 |                |                |                                              |   |                |       |
| 2                                                    | [center]                                                           | What center are you from?                                           | text                                                                                                                                                                                                                                                                                                                                                                                                                                                                                                 |   |                |                                                     |              |                |                                                       |   |                |                                                 |                |                |                                              |   |                |       |
| 3                                                    | [experience]                                                       | How many years have you been in practice as an attending physician? | dropdown<br><table border="1"> <tr><td>1</td><td>&lt; 1 year</td></tr> <tr><td>2</td><td>1 to 4 years</td></tr> <tr><td>3</td><td>5 to 9 years</td></tr> <tr><td>4</td><td>10 to 14 years</td></tr> <tr><td>5</td><td>15 to 19 years</td></tr> <tr><td>6</td><td>20 or more years</td></tr> </table>                                                                                                                                                                                                 | 1 | < 1 year       | 2                                                   | 1 to 4 years | 3              | 5 to 9 years                                          | 4 | 10 to 14 years | 5                                               | 15 to 19 years | 6              | 20 or more years                             |   |                |       |
| 1                                                    | < 1 year                                                           |                                                                     |                                                                                                                                                                                                                                                                                                                                                                                                                                                                                                      |   |                |                                                     |              |                |                                                       |   |                |                                                 |                |                |                                              |   |                |       |
| 2                                                    | 1 to 4 years                                                       |                                                                     |                                                                                                                                                                                                                                                                                                                                                                                                                                                                                                      |   |                |                                                     |              |                |                                                       |   |                |                                                 |                |                |                                              |   |                |       |
| 3                                                    | 5 to 9 years                                                       |                                                                     |                                                                                                                                                                                                                                                                                                                                                                                                                                                                                                      |   |                |                                                     |              |                |                                                       |   |                |                                                 |                |                |                                              |   |                |       |
| 4                                                    | 10 to 14 years                                                     |                                                                     |                                                                                                                                                                                                                                                                                                                                                                                                                                                                                                      |   |                |                                                     |              |                |                                                       |   |                |                                                 |                |                |                                              |   |                |       |
| 5                                                    | 15 to 19 years                                                     |                                                                     |                                                                                                                                                                                                                                                                                                                                                                                                                                                                                                      |   |                |                                                     |              |                |                                                       |   |                |                                                 |                |                |                                              |   |                |       |
| 6                                                    | 20 or more years                                                   |                                                                     |                                                                                                                                                                                                                                                                                                                                                                                                                                                                                                      |   |                |                                                     |              |                |                                                       |   |                |                                                 |                |                |                                              |   |                |       |
| 4                                                    | [geneticist]                                                       | Do you have a geneticist on faculty in the division of cardiology?  | yesno<br><table border="1"> <tr><td>1</td><td>Yes</td></tr> <tr><td>0</td><td>No</td></tr> </table>                                                                                                                                                                                                                                                                                                                                                                                                  | 1 | Yes            | 0                                                   | No           |                |                                                       |   |                |                                                 |                |                |                                              |   |                |       |
| 1                                                    | Yes                                                                |                                                                     |                                                                                                                                                                                                                                                                                                                                                                                                                                                                                                      |   |                |                                                     |              |                |                                                       |   |                |                                                 |                |                |                                              |   |                |       |
| 0                                                    | No                                                                 |                                                                     |                                                                                                                                                                                                                                                                                                                                                                                                                                                                                                      |   |                |                                                     |              |                |                                                       |   |                |                                                 |                |                |                                              |   |                |       |
| 5                                                    | [genetic_counselor1]                                               | Do you have a genetic counselor within the division of cardiology?  | yesno<br><table border="1"> <tr><td>1</td><td>Yes</td></tr> <tr><td>0</td><td>No</td></tr> </table>                                                                                                                                                                                                                                                                                                                                                                                                  | 1 | Yes            | 0                                                   | No           |                |                                                       |   |                |                                                 |                |                |                                              |   |                |       |
| 1                                                    | Yes                                                                |                                                                     |                                                                                                                                                                                                                                                                                                                                                                                                                                                                                                      |   |                |                                                     |              |                |                                                       |   |                |                                                 |                |                |                                              |   |                |       |
| 0                                                    | No                                                                 |                                                                     |                                                                                                                                                                                                                                                                                                                                                                                                                                                                                                      |   |                |                                                     |              |                |                                                       |   |                |                                                 |                |                |                                              |   |                |       |
| 6                                                    | [gen_coun]                                                         | How do you access genetic counseling? (Check all that apply)        | checkbox<br><table border="1"> <tr><td>1</td><td>gen_coun__1</td><td>Refer to separate genetics team / genetic counselor</td></tr> <tr><td>2</td><td>gen_coun__2</td><td>Refer to genetic counselor as part of cardiology team</td></tr> <tr><td>3</td><td>gen_coun__3</td><td>Independently performed by cardiology physician</td></tr> <tr><td>4</td><td>gen_coun__4</td><td>We do not routinely offer genetic counseling</td></tr> <tr><td>5</td><td>gen_coun__5</td><td>Other</td></tr> </table> | 1 | gen_coun__1    | Refer to separate genetics team / genetic counselor | 2            | gen_coun__2    | Refer to genetic counselor as part of cardiology team | 3 | gen_coun__3    | Independently performed by cardiology physician | 4              | gen_coun__4    | We do not routinely offer genetic counseling | 5 | gen_coun__5    | Other |
| 1                                                    | gen_coun__1                                                        | Refer to separate genetics team / genetic counselor                 |                                                                                                                                                                                                                                                                                                                                                                                                                                                                                                      |   |                |                                                     |              |                |                                                       |   |                |                                                 |                |                |                                              |   |                |       |
| 2                                                    | gen_coun__2                                                        | Refer to genetic counselor as part of cardiology team               |                                                                                                                                                                                                                                                                                                                                                                                                                                                                                                      |   |                |                                                     |              |                |                                                       |   |                |                                                 |                |                |                                              |   |                |       |
| 3                                                    | gen_coun__3                                                        | Independently performed by cardiology physician                     |                                                                                                                                                                                                                                                                                                                                                                                                                                                                                                      |   |                |                                                     |              |                |                                                       |   |                |                                                 |                |                |                                              |   |                |       |
| 4                                                    | gen_coun__4                                                        | We do not routinely offer genetic counseling                        |                                                                                                                                                                                                                                                                                                                                                                                                                                                                                                      |   |                |                                                     |              |                |                                                       |   |                |                                                 |                |                |                                              |   |                |       |
| 5                                                    | gen_coun__5                                                        | Other                                                               |                                                                                                                                                                                                                                                                                                                                                                                                                                                                                                      |   |                |                                                     |              |                |                                                       |   |                |                                                 |                |                |                                              |   |                |       |
| 7                                                    | [counseling_txt]<br>Show the field ONLY if:<br>[gen_coun(5)] = '1' | What other methods do you utilize to access genetic counseling?     | text                                                                                                                                                                                                                                                                                                                                                                                                                                                                                                 |   |                |                                                     |              |                |                                                       |   |                |                                                 |                |                |                                              |   |                |       |
| 8                                                    | [gen_testing]                                                      | How do you access genetic testing? (Check all that apply)           | checkbox<br><table border="1"> <tr><td>1</td><td>gen_testing__1</td><td>Refer to separate genetics team</td></tr> <tr><td>2</td><td>gen_testing__2</td><td>Refer to genetics as part of cardiology team</td></tr> <tr><td>3</td><td>gen_testing__3</td><td>Independently performed by cardiology physician</td></tr> <tr><td>4</td><td>gen_testing__4</td><td>We do not routinely offer genetic testing</td></tr> <tr><td>5</td><td>gen_testing__5</td><td>Other</td></tr> </table>                  | 1 | gen_testing__1 | Refer to separate genetics team                     | 2            | gen_testing__2 | Refer to genetics as part of cardiology team          | 3 | gen_testing__3 | Independently performed by cardiology physician | 4              | gen_testing__4 | We do not routinely offer genetic testing    | 5 | gen_testing__5 | Other |
| 1                                                    | gen_testing__1                                                     | Refer to separate genetics team                                     |                                                                                                                                                                                                                                                                                                                                                                                                                                                                                                      |   |                |                                                     |              |                |                                                       |   |                |                                                 |                |                |                                              |   |                |       |
| 2                                                    | gen_testing__2                                                     | Refer to genetics as part of cardiology team                        |                                                                                                                                                                                                                                                                                                                                                                                                                                                                                                      |   |                |                                                     |              |                |                                                       |   |                |                                                 |                |                |                                              |   |                |       |
| 3                                                    | gen_testing__3                                                     | Independently performed by cardiology physician                     |                                                                                                                                                                                                                                                                                                                                                                                                                                                                                                      |   |                |                                                     |              |                |                                                       |   |                |                                                 |                |                |                                              |   |                |       |
| 4                                                    | gen_testing__4                                                     | We do not routinely offer genetic testing                           |                                                                                                                                                                                                                                                                                                                                                                                                                                                                                                      |   |                |                                                     |              |                |                                                       |   |                |                                                 |                |                |                                              |   |                |       |
| 5                                                    | gen_testing__5                                                     | Other                                                               |                                                                                                                                                                                                                                                                                                                                                                                                                                                                                                      |   |                |                                                     |              |                |                                                       |   |                |                                                 |                |                |                                              |   |                |       |
| 9                                                    | [testing_txt]<br>Show the field ONLY if:<br>[gen_testing(3)] = '1' | What other methods do you utilize to access genetic testing?        | text                                                                                                                                                                                                                                                                                                                                                                                                                                                                                                 |   |                |                                                     |              |                |                                                       |   |                |                                                 |                |                |                                              |   |                |       |

|    |                                                        |                                                                                                                                                                                                                                |                                                                                                                                                                                                                                     |   |               |   |            |   |           |   |           |   |              |
|----|--------------------------------------------------------|--------------------------------------------------------------------------------------------------------------------------------------------------------------------------------------------------------------------------------|-------------------------------------------------------------------------------------------------------------------------------------------------------------------------------------------------------------------------------------|---|---------------|---|------------|---|-----------|---|-----------|---|--------------|
| 10 | [inhouse]                                              | Do you use in-house genetic testing, commercial genetic testing, or both?                                                                                                                                                      | radio<br><table border="1"> <tr><td>1</td><td>In house</td></tr> <tr><td>2</td><td>Commerical</td></tr> <tr><td>3</td><td>Both</td></tr> </table>                                                                                   | 1 | In house      | 2 | Commerical | 3 | Both      |   |           |   |              |
| 1  | In house                                               |                                                                                                                                                                                                                                |                                                                                                                                                                                                                                     |   |               |   |            |   |           |   |           |   |              |
| 2  | Commerical                                             |                                                                                                                                                                                                                                |                                                                                                                                                                                                                                     |   |               |   |            |   |           |   |           |   |              |
| 3  | Both                                                   |                                                                                                                                                                                                                                |                                                                                                                                                                                                                                     |   |               |   |            |   |           |   |           |   |              |
| 11 | [wes]                                                  | How often do you perform whole exome sequencing on a child with cardiomyopathy?                                                                                                                                                | radio<br><table border="1"> <tr><td>1</td><td>Always</td></tr> <tr><td>2</td><td>Frequently</td></tr> <tr><td>3</td><td>Sometimes</td></tr> <tr><td>4</td><td>Not often</td></tr> <tr><td>5</td><td>Never</td></tr> </table>        | 1 | Always        | 2 | Frequently | 3 | Sometimes | 4 | Not often | 5 | Never        |
| 1  | Always                                                 |                                                                                                                                                                                                                                |                                                                                                                                                                                                                                     |   |               |   |            |   |           |   |           |   |              |
| 2  | Frequently                                             |                                                                                                                                                                                                                                |                                                                                                                                                                                                                                     |   |               |   |            |   |           |   |           |   |              |
| 3  | Sometimes                                              |                                                                                                                                                                                                                                |                                                                                                                                                                                                                                     |   |               |   |            |   |           |   |           |   |              |
| 4  | Not often                                              |                                                                                                                                                                                                                                |                                                                                                                                                                                                                                     |   |               |   |            |   |           |   |           |   |              |
| 5  | Never                                                  |                                                                                                                                                                                                                                |                                                                                                                                                                                                                                     |   |               |   |            |   |           |   |           |   |              |
| 12 | [wes_yn]                                               | Are there specific findings that prompt you to consider whole exome sequencing?                                                                                                                                                | yesno<br><table border="1"> <tr><td>1</td><td>Yes</td></tr> <tr><td>0</td><td>No</td></tr> </table>                                                                                                                                 | 1 | Yes           | 0 | No         |   |           |   |           |   |              |
| 1  | Yes                                                    |                                                                                                                                                                                                                                |                                                                                                                                                                                                                                     |   |               |   |            |   |           |   |           |   |              |
| 0  | No                                                     |                                                                                                                                                                                                                                |                                                                                                                                                                                                                                     |   |               |   |            |   |           |   |           |   |              |
| 13 | [wes_txt]<br>Show the field ONLY if:<br>[wes_yn] = '1' | What findings prompt you to pursue testing with whole exome sequencing?                                                                                                                                                        | notes                                                                                                                                                                                                                               |   |               |   |            |   |           |   |           |   |              |
| 14 | [interval]                                             | What is a reasonable interval (in years) to repeat genetic testing in a patient who is phenotype positive but without a known genetic basis?<br><i>years</i>                                                                   | text                                                                                                                                                                                                                                |   |               |   |            |   |           |   |           |   |              |
| 15 | [cost]                                                 | How often do you find that cost is prohibitive to obtaining genetic testing?                                                                                                                                                   | radio<br><table border="1"> <tr><td>1</td><td>Almost Always</td></tr> <tr><td>2</td><td>Often</td></tr> <tr><td>3</td><td>Neutral</td></tr> <tr><td>4</td><td>Not often</td></tr> <tr><td>5</td><td>Almost never</td></tr> </table> | 1 | Almost Always | 2 | Often      | 3 | Neutral   | 4 | Not often | 5 | Almost never |
| 1  | Almost Always                                          |                                                                                                                                                                                                                                |                                                                                                                                                                                                                                     |   |               |   |            |   |           |   |           |   |              |
| 2  | Often                                                  |                                                                                                                                                                                                                                |                                                                                                                                                                                                                                     |   |               |   |            |   |           |   |           |   |              |
| 3  | Neutral                                                |                                                                                                                                                                                                                                |                                                                                                                                                                                                                                     |   |               |   |            |   |           |   |           |   |              |
| 4  | Not often                                              |                                                                                                                                                                                                                                |                                                                                                                                                                                                                                     |   |               |   |            |   |           |   |           |   |              |
| 5  | Almost never                                           |                                                                                                                                                                                                                                |                                                                                                                                                                                                                                     |   |               |   |            |   |           |   |           |   |              |
| 16 | [txt1]                                                 | Scenario 1:                                                                                                                                                                                                                    | descriptive                                                                                                                                                                                                                         |   |               |   |            |   |           |   |           |   |              |
| 17 | [scenario1_pathogenic]                                 | Genetic testing reveals that your patient who has a clinical diagnosis of cardiomyopathy has a pathogenic variant. Do you offer familial cascade testing for healthy family members for the variant identified?                | yesno<br><table border="1"> <tr><td>1</td><td>Yes</td></tr> <tr><td>0</td><td>No</td></tr> </table>                                                                                                                                 | 1 | Yes           | 0 | No         |   |           |   |           |   |              |
| 1  | Yes                                                    |                                                                                                                                                                                                                                |                                                                                                                                                                                                                                     |   |               |   |            |   |           |   |           |   |              |
| 0  | No                                                     |                                                                                                                                                                                                                                |                                                                                                                                                                                                                                     |   |               |   |            |   |           |   |           |   |              |
| 18 | [scenario1_likelypathogenic]                           | Genetic testing reveals that your patient who has a clinical diagnosis of cardiomyopathy has a likely pathogenic variant. Do you offer familial cascade testing for healthy family members for the variant identified?         | yesno<br><table border="1"> <tr><td>1</td><td>Yes</td></tr> <tr><td>0</td><td>No</td></tr> </table>                                                                                                                                 | 1 | Yes           | 0 | No         |   |           |   |           |   |              |
| 1  | Yes                                                    |                                                                                                                                                                                                                                |                                                                                                                                                                                                                                     |   |               |   |            |   |           |   |           |   |              |
| 0  | No                                                     |                                                                                                                                                                                                                                |                                                                                                                                                                                                                                     |   |               |   |            |   |           |   |           |   |              |
| 19 | [scenario1_vus]                                        | Genetic testing reveals that your patient who has a clinical diagnosis of cardiomyopathy has a variant of uncertain significance. Do you offer familial cascade testing for healthy family members for the variant identified? | yesno<br><table border="1"> <tr><td>1</td><td>Yes</td></tr> <tr><td>0</td><td>No</td></tr> </table>                                                                                                                                 | 1 | Yes           | 0 | No         |   |           |   |           |   |              |
| 1  | Yes                                                    |                                                                                                                                                                                                                                |                                                                                                                                                                                                                                     |   |               |   |            |   |           |   |           |   |              |
| 0  | No                                                     |                                                                                                                                                                                                                                |                                                                                                                                                                                                                                     |   |               |   |            |   |           |   |           |   |              |
| 20 | [scenario1_likelybenign]                               | Genetic testing reveals that your patient who has a clinical diagnosis of cardiomyopathy has a likely benign variant. Do you offer familial cascade testing for healthy family members for the variant identified?             | yesno<br><table border="1"> <tr><td>1</td><td>Yes</td></tr> <tr><td>0</td><td>No</td></tr> </table>                                                                                                                                 | 1 | Yes           | 0 | No         |   |           |   |           |   |              |
| 1  | Yes                                                    |                                                                                                                                                                                                                                |                                                                                                                                                                                                                                     |   |               |   |            |   |           |   |           |   |              |
| 0  | No                                                     |                                                                                                                                                                                                                                |                                                                                                                                                                                                                                     |   |               |   |            |   |           |   |           |   |              |
| 21 | [scenario1_benign]                                     | Genetic testing reveals that your patient who has a clinical diagnosis of cardiomyopathy has a benign variant. Do you offer familial cascade testing for healthy family members for the variant identified?                    | yesno<br><table border="1"> <tr><td>1</td><td>Yes</td></tr> <tr><td>0</td><td>No</td></tr> </table>                                                                                                                                 | 1 | Yes           | 0 | No         |   |           |   |           |   |              |
| 1  | Yes                                                    |                                                                                                                                                                                                                                |                                                                                                                                                                                                                                     |   |               |   |            |   |           |   |           |   |              |
| 0  | No                                                     |                                                                                                                                                                                                                                |                                                                                                                                                                                                                                     |   |               |   |            |   |           |   |           |   |              |
| 22 | [txt2]                                                 | Scenario 2:                                                                                                                                                                                                                    | descriptive                                                                                                                                                                                                                         |   |               |   |            |   |           |   |           |   |              |
| 23 | [scenario2_path]                                       | You have an asymptomatic patient with no clinical signs of cardiomyopathy who tested negative for a pathogenic variant found in their parent who has cardiomyopathy. Do you discharge them from cardiology clinic?             | yesno<br><table border="1"> <tr><td>1</td><td>Yes</td></tr> <tr><td>0</td><td>No</td></tr> </table>                                                                                                                                 | 1 | Yes           | 0 | No         |   |           |   |           |   |              |
| 1  | Yes                                                    |                                                                                                                                                                                                                                |                                                                                                                                                                                                                                     |   |               |   |            |   |           |   |           |   |              |
| 0  | No                                                     |                                                                                                                                                                                                                                |                                                                                                                                                                                                                                     |   |               |   |            |   |           |   |           |   |              |
| 24 | [scenario2_likelypath]                                 | You have an asymptomatic patient with no clinical signs of cardiomyopathy who tested negative for a likely pathogenic variant found in their parent who has cardiomyopathy. Do you discharge them from cardiology clinic?      | yesno<br><table border="1"> <tr><td>1</td><td>Yes</td></tr> <tr><td>0</td><td>No</td></tr> </table>                                                                                                                                 | 1 | Yes           | 0 | No         |   |           |   |           |   |              |
| 1  | Yes                                                    |                                                                                                                                                                                                                                |                                                                                                                                                                                                                                     |   |               |   |            |   |           |   |           |   |              |
| 0  | No                                                     |                                                                                                                                                                                                                                |                                                                                                                                                                                                                                     |   |               |   |            |   |           |   |           |   |              |

|    |                                                                   |                                                                                                                                                                                                                                 |                                                                                                                                                                                                                                                                                                                                                                                     |   |                          |   |                                                 |   |                                                    |   |                                                |   |                         |
|----|-------------------------------------------------------------------|---------------------------------------------------------------------------------------------------------------------------------------------------------------------------------------------------------------------------------|-------------------------------------------------------------------------------------------------------------------------------------------------------------------------------------------------------------------------------------------------------------------------------------------------------------------------------------------------------------------------------------|---|--------------------------|---|-------------------------------------------------|---|----------------------------------------------------|---|------------------------------------------------|---|-------------------------|
| 25 | [scenario2_vus]                                                   | You have an asymptomatic patient with no clinical signs of cardiomyopathy who tested negative for a variant of unknown significance found in their parent who has cardiomyopathy. Do you discharge them from cardiology clinic? | yesno<br><table border="1"> <tr><td>1</td><td>Yes</td></tr> <tr><td>0</td><td>No</td></tr> </table>                                                                                                                                                                                                                                                                                 | 1 | Yes                      | 0 | No                                              |   |                                                    |   |                                                |   |                         |
| 1  | Yes                                                               |                                                                                                                                                                                                                                 |                                                                                                                                                                                                                                                                                                                                                                                     |   |                          |   |                                                 |   |                                                    |   |                                                |   |                         |
| 0  | No                                                                |                                                                                                                                                                                                                                 |                                                                                                                                                                                                                                                                                                                                                                                     |   |                          |   |                                                 |   |                                                    |   |                                                |   |                         |
| 26 | [scenario2_likelybenign]                                          | You have an asymptomatic patient with no clinical signs of cardiomyopathy who tested negative for a likely benign variant found in their parent who has cardiomyopathy. Do you discharge them from cardiology clinic?           | yesno<br><table border="1"> <tr><td>1</td><td>Yes</td></tr> <tr><td>0</td><td>No</td></tr> </table>                                                                                                                                                                                                                                                                                 | 1 | Yes                      | 0 | No                                              |   |                                                    |   |                                                |   |                         |
| 1  | Yes                                                               |                                                                                                                                                                                                                                 |                                                                                                                                                                                                                                                                                                                                                                                     |   |                          |   |                                                 |   |                                                    |   |                                                |   |                         |
| 0  | No                                                                |                                                                                                                                                                                                                                 |                                                                                                                                                                                                                                                                                                                                                                                     |   |                          |   |                                                 |   |                                                    |   |                                                |   |                         |
| 27 | [scenario2_benign]                                                | You have an asymptomatic patient with no clinical signs of cardiomyopathy who tested negative for a benign variant found in their parent who has cardiomyopathy. Do you discharge them from cardiology clinic?                  | yesno<br><table border="1"> <tr><td>1</td><td>Yes</td></tr> <tr><td>0</td><td>No</td></tr> </table>                                                                                                                                                                                                                                                                                 | 1 | Yes                      | 0 | No                                              |   |                                                    |   |                                                |   |                         |
| 1  | Yes                                                               |                                                                                                                                                                                                                                 |                                                                                                                                                                                                                                                                                                                                                                                     |   |                          |   |                                                 |   |                                                    |   |                                                |   |                         |
| 0  | No                                                                |                                                                                                                                                                                                                                 |                                                                                                                                                                                                                                                                                                                                                                                     |   |                          |   |                                                 |   |                                                    |   |                                                |   |                         |
| 28 | [reliability]                                                     | How reliable are genetic testing interpretations (i.e. classification as pathogenic or benign)?                                                                                                                                 | radio<br><table border="1"> <tr><td>1</td><td>They are always accurate</td></tr> <tr><td>2</td><td>They are mostly accurate, but can rarely change</td></tr> <tr><td>3</td><td>They are mostly accurate, but can sometimes change</td></tr> <tr><td>4</td><td>They are mostly accurate, but can often change</td></tr> <tr><td>5</td><td>They are never accurate</td></tr> </table> | 1 | They are always accurate | 2 | They are mostly accurate, but can rarely change | 3 | They are mostly accurate, but can sometimes change | 4 | They are mostly accurate, but can often change | 5 | They are never accurate |
| 1  | They are always accurate                                          |                                                                                                                                                                                                                                 |                                                                                                                                                                                                                                                                                                                                                                                     |   |                          |   |                                                 |   |                                                    |   |                                                |   |                         |
| 2  | They are mostly accurate, but can rarely change                   |                                                                                                                                                                                                                                 |                                                                                                                                                                                                                                                                                                                                                                                     |   |                          |   |                                                 |   |                                                    |   |                                                |   |                         |
| 3  | They are mostly accurate, but can sometimes change                |                                                                                                                                                                                                                                 |                                                                                                                                                                                                                                                                                                                                                                                     |   |                          |   |                                                 |   |                                                    |   |                                                |   |                         |
| 4  | They are mostly accurate, but can often change                    |                                                                                                                                                                                                                                 |                                                                                                                                                                                                                                                                                                                                                                                     |   |                          |   |                                                 |   |                                                    |   |                                                |   |                         |
| 5  | They are never accurate                                           |                                                                                                                                                                                                                                 |                                                                                                                                                                                                                                                                                                                                                                                     |   |                          |   |                                                 |   |                                                    |   |                                                |   |                         |
| 29 | [recall_process]                                                  | Do you have a process to follow-up with patients who were previously discharged from follow-up if a variant is reclassified that impacts their overall risk?                                                                    | yesno<br><table border="1"> <tr><td>1</td><td>Yes</td></tr> <tr><td>0</td><td>No</td></tr> </table>                                                                                                                                                                                                                                                                                 | 1 | Yes                      | 0 | No                                              |   |                                                    |   |                                                |   |                         |
| 1  | Yes                                                               |                                                                                                                                                                                                                                 |                                                                                                                                                                                                                                                                                                                                                                                     |   |                          |   |                                                 |   |                                                    |   |                                                |   |                         |
| 0  | No                                                                |                                                                                                                                                                                                                                 |                                                                                                                                                                                                                                                                                                                                                                                     |   |                          |   |                                                 |   |                                                    |   |                                                |   |                         |
| 30 | [recall_txt]<br>Show the field ONLY if:<br>[recall_process] = '1' | What mechanism(s) do you use to track patients discharged from cardiology follow-up?                                                                                                                                            | notes                                                                                                                                                                                                                                                                                                                                                                               |   |                          |   |                                                 |   |                                                    |   |                                                |   |                         |
| 31 | [genetics_survey_complete]                                        | Section Header: <i>Form Status</i><br>Complete?                                                                                                                                                                                 | dropdown<br><table border="1"> <tr><td>0</td><td>Incomplete</td></tr> <tr><td>1</td><td>Unverified</td></tr> <tr><td>2</td><td>Complete</td></tr> </table>                                                                                                                                                                                                                          | 0 | Incomplete               | 1 | Unverified                                      | 2 | Complete                                           |   |                                                |   |                         |
| 0  | Incomplete                                                        |                                                                                                                                                                                                                                 |                                                                                                                                                                                                                                                                                                                                                                                     |   |                          |   |                                                 |   |                                                    |   |                                                |   |                         |
| 1  | Unverified                                                        |                                                                                                                                                                                                                                 |                                                                                                                                                                                                                                                                                                                                                                                     |   |                          |   |                                                 |   |                                                    |   |                                                |   |                         |
| 2  | Complete                                                          |                                                                                                                                                                                                                                 |                                                                                                                                                                                                                                                                                                                                                                                     |   |                          |   |                                                 |   |                                                    |   |                                                |   |                         |
